# Supplementary material
Source: Springer Nature journal article supplement (https://www.springermedizin.de/resource/supplementary/12936_2011_2104_MOESM6_ESM.pdf/9543370)

## A) Mongola

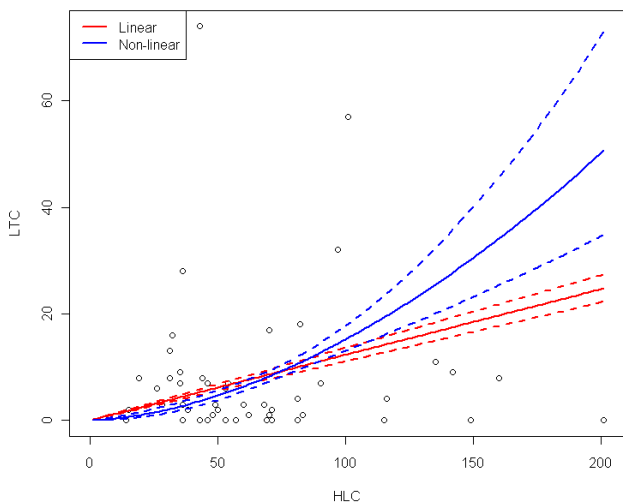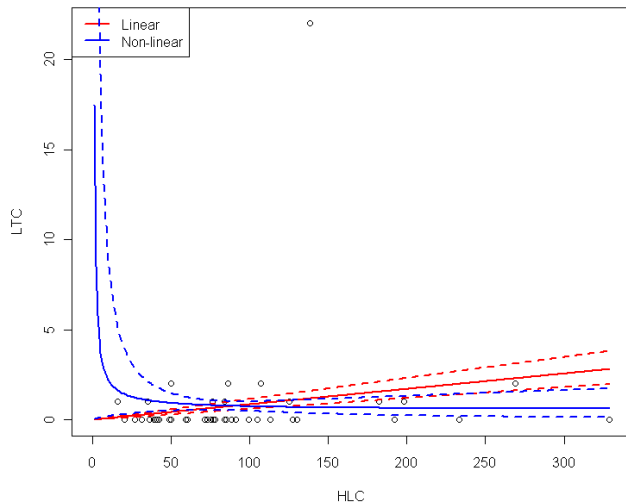

## B) Arena Blanca

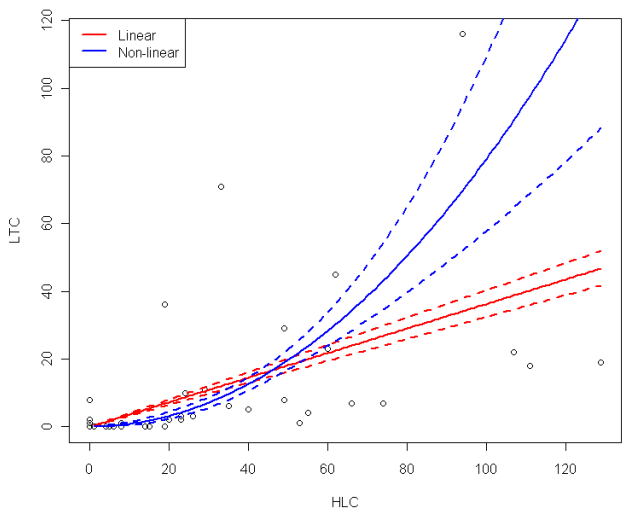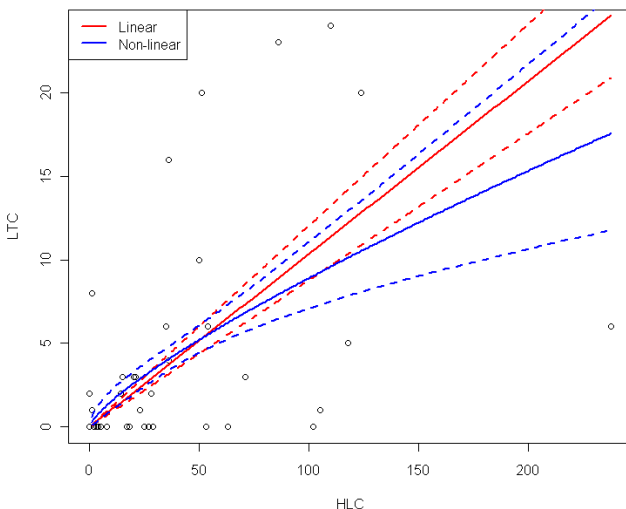

## C) Riaba

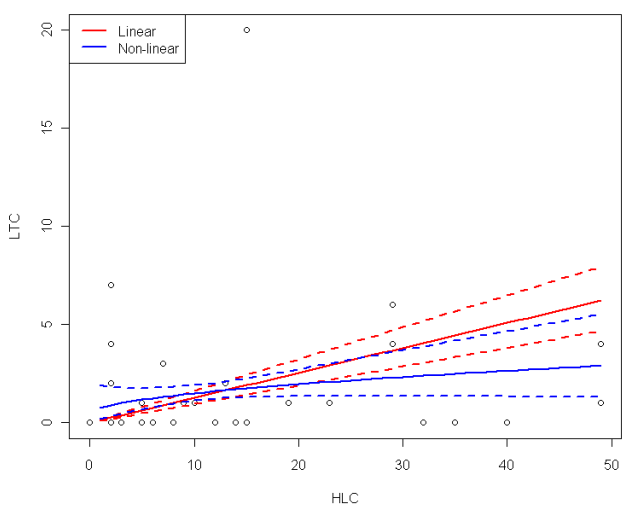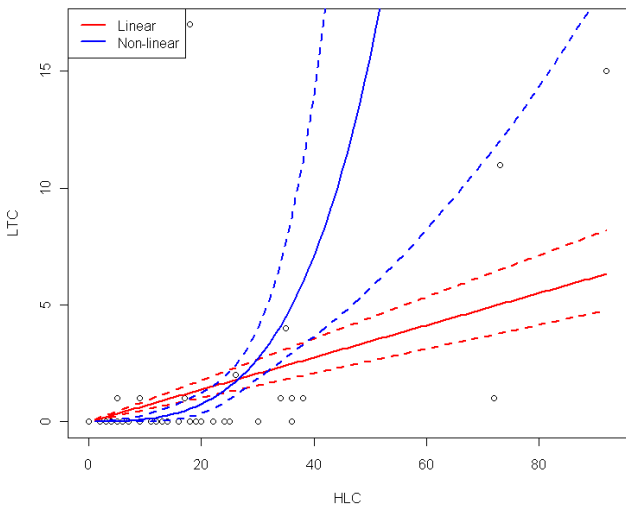

**Indoors**

**Outdoors**

Supplement: MOESM6 [file 9543370]
